# Supplementary material for: A self-delivery photodynamic sensitizer for enhanced DNA damage by PARP inhibition
Source: Royal Society of Chemistry journal article supplement (doi:10.1039/d2bm01320g), 2022-11-04
Supplement: d2bm01320g1.pdf [file d2bm01320g1.pdf]

## **Electronic Supplementary Information (ESI)**

*of*

### **Self-delivery photodynamic sensitizer for enhanced DNA damage by PARP inhibition**

*Ren-Jiang Kong,<sup>a</sup> Xin-Yu Li,<sup>a</sup> Jia-Qi Huang,<sup>a</sup> Xiang Zhou,<sup>a</sup> Fu-An Deng,<sup>b</sup> Yan-Mei*

*Li,<sup>a</sup> Ling-Shan Liu,<sup>a</sup> Shi-Ying Li<sup>b</sup> and Hong Cheng<sup>\*a</sup>*

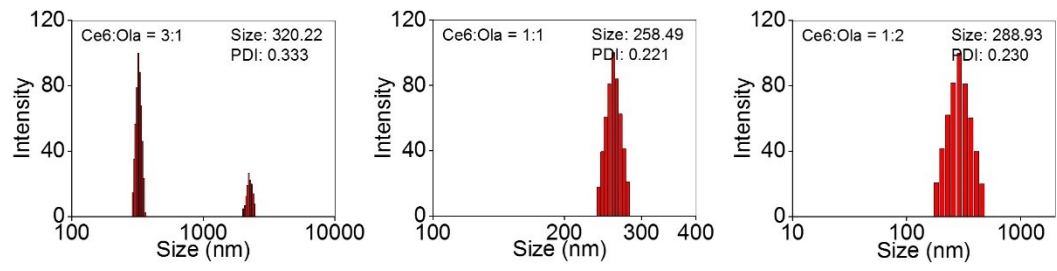

**Fig. S1** Particle size distributions of formulations obtained at the feed ratios of Ce6 and Ola under 3:1, 1:1 and 1:2.

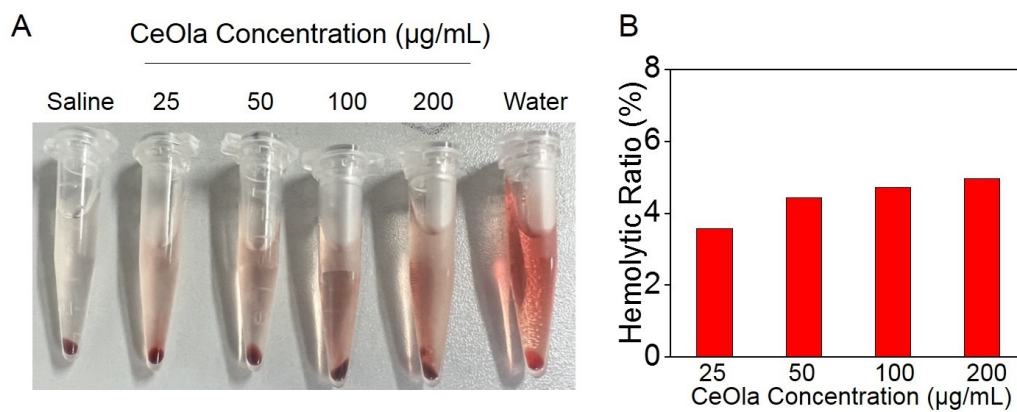

**Fig. S2** (A) Hemolysis assay of CeOla at different concentrations and (B) the corresponding hemolysis rate calculation.

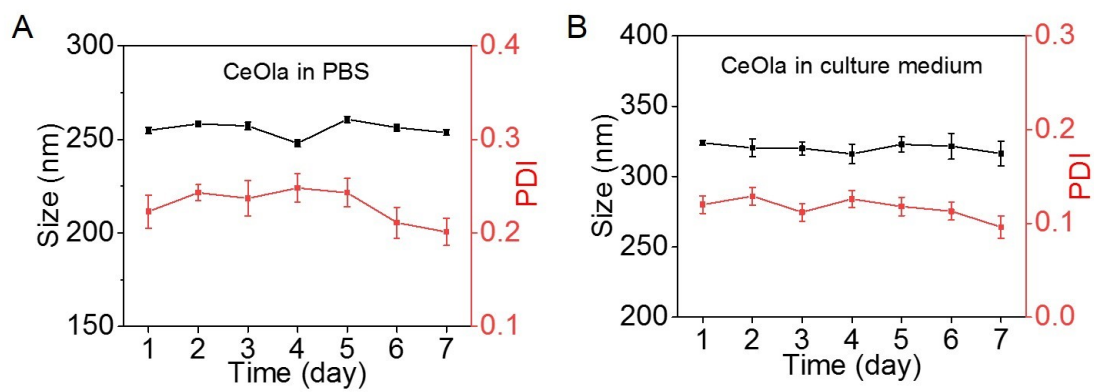

**Fig. S3** Particle size and PDI changes of CeOla in (A) PBS and (B) cell culture medium (DMEM) within 7 days.

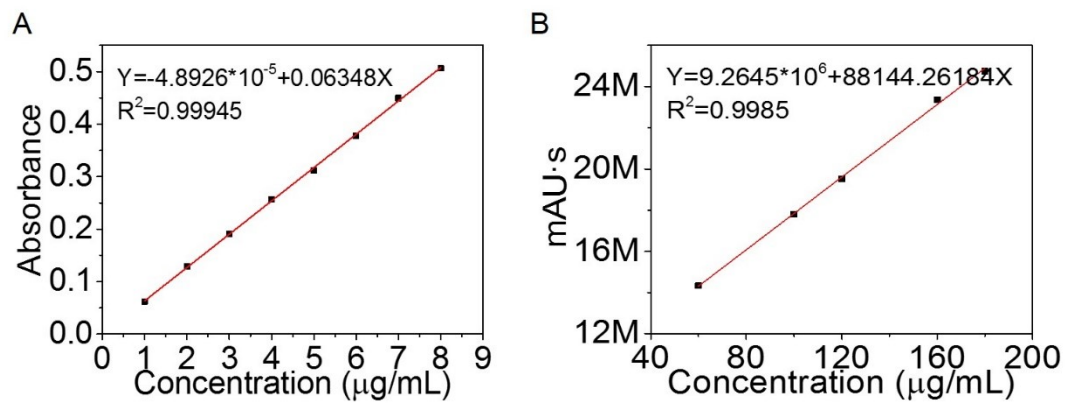

**Fig. S4** Standard curves of (A) Ce6 and (B) Ola obtained by UV-vis spectrum and HPLC.

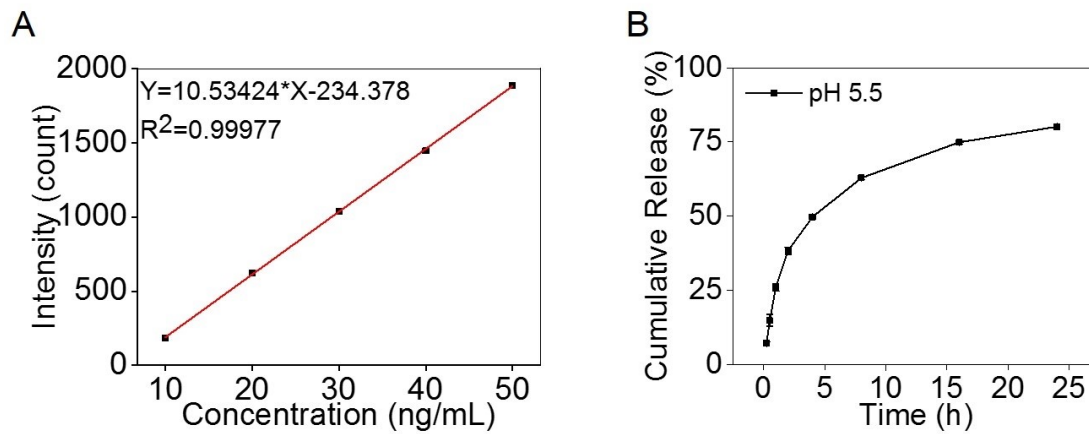

**Fig. S5** (A) Standard curve of Ce6 obtained by fluorescence spectrum and (B) cumulative release of Ce6 from CeOla at pH 5.5.
